# Supplementary material for: A Ca2+ concentration of 1.5 mM, as present in IMDM but not in RPMI, is critical for maximal response of Th cells to PMA/ionomycin
Source: PubMed Central journal article supplement — Eur J Immunol. 2015 Feb 17;45(4):1270–3. doi: 10.1002/eji.201445247 (PMC4407954; doi:10.1002/eji.201445247), 2015-02-17

Supporting information Figure 1

**Representative illustration of gating strategy and cytokine frequencies**

SI LP cells from colitic mice were stimulated with PMA/ionomycin in RPMI, IMDM or Ca<sup>2+</sup>-supplemented RPMI and stained for intracellular cytokines. (A) Cells were gated according to forward scatter (FSC), side scatter (SSC), viability before fixation (pacific orange, PO), pulse shape (FSC-height (FSC-H)/ FSC-width (FSC-W)) and expression of CD4, to identify viable, individual Th lymphocytes. (B) Representative staining for cytokine expression by SI LP Th cells, restimulated in the different media as indicated.

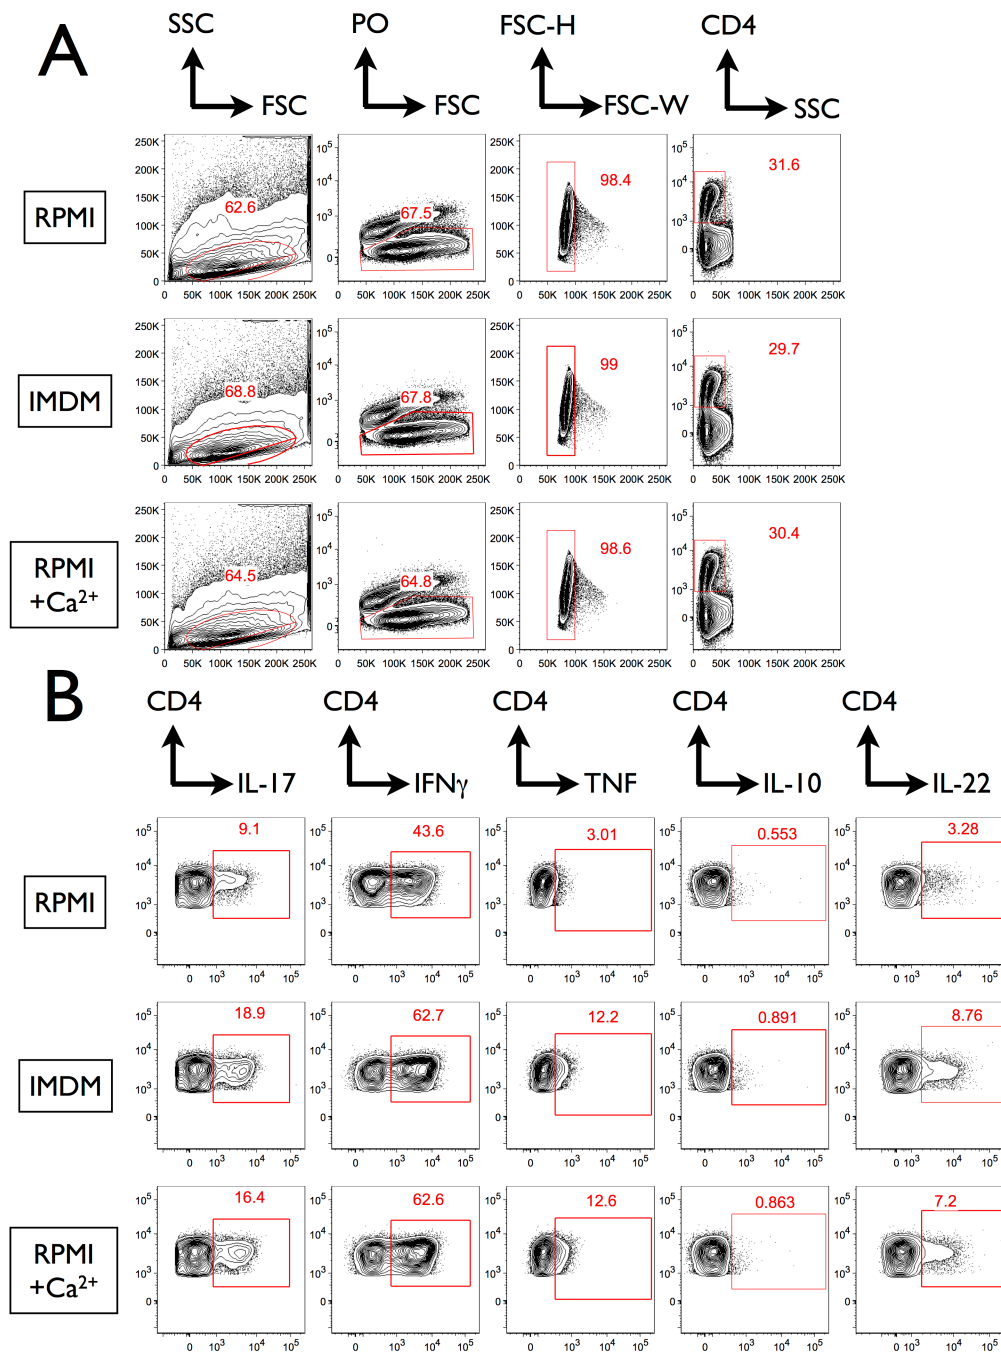

Supplement: eji0045-1270-sd1.pdf [file eji0045-1270-sd1.pdf]
